# Supplementary material for: Single-Cell RNA-Seq Analysis Reveals Microenvironmental Infiltration of Plasma Cells and Hepatocytic Prognostic Markers in HCC With Cirrhosis
Source: Front Oncol. 2020 Nov 2;10:596318. doi: 10.3389/fonc.2020.596318 (PMC7667372; doi:10.3389/fonc.2020.596318)
Supplement: Supplementary Table 1 — Gene markers of eight cell types. [file Table_1.xlsx]

## Sheet: Sheet1
Supplementary Table1:Gene markers of eight cell types.
Cell_type	Gene_marker
Tcell	LTB, CD3D, CD3E
Endothelial cell	IFI27, PECAM1, PLVAP
Macrophage	C1QA, C1QB, VSIG4, CLEC4F, CSF1R
Monocyte	CD14, S100A9, S100A8, LYZ
Fibroblast	SOD3, ACTA2, BGN
Hepatocyte	ALB, KRT8, SPP1
Epithelial cell	CD7, XCL1, XCL2, CCL3
Bcell	CD79A, IGHG1, IGHG3
